# Supplementary material for: Centrifugo-pneumatic valve for metering of highly wetting liquids on centrifugal microfluidic platforms
Source: Royal Society of Chemistry journal article supplement (doi:10.1039/b914415c), 2009-01-01
Supplement: b914415c.pdf [file b914415c.pdf]

## Surface Tension

The surface tension was measured using the pending drop method with the “contact angle system OCA” from DataPhysics Instruments GmbH, Germany. 10 data points per value were measured and the mean and standard deviation are presented.

| Liquid                                 | 0.00 %<br>Tween | 0.01 %<br>Tween | 0.03 %<br>Tween | 0.10 %<br>Tween | 0.30 %<br>Tween | 2.0 %<br>Tween | 10.0 %<br>Tween | Ethanol |
|----------------------------------------|-----------------|-----------------|-----------------|-----------------|-----------------|----------------|-----------------|---------|
| Surface tension /mN·m <sup>-1</sup>    | 72.3            | 52.0            | 47.4            | 42.9            | 42.7            | 39.5           | 37.3            | 26.1    |
| Standard deviation /mN·m <sup>-1</sup> | 0.3             | 2.4             | 1.4             | 0.5             | 0.6             | 1.1            | 0.4             | 1.1     |

## Contact Angle

Contact angles for different liquids were measured on the substrate Topas 5013 (supplied by the microfluidic ChipShop, Germany). The contact angle was measured using the dynamic sessile drop method with the “contact angle system OCA” from DataPhysics Instruments GmbH, Germany. 40 data points per value were measured, averaged and the procedure repeated three times. Mean and standard deviation of these three measurements are presented.

| Liquid                     | 0.00 %<br>Tween | 0.01 %<br>Tween | 0.03 %<br>Tween | 0.10 %<br>Tween | 0.30 %<br>Tween | 2.0 %<br>Tween | 10.0 %<br>Tween | Ethanol |
|----------------------------|-----------------|-----------------|-----------------|-----------------|-----------------|----------------|-----------------|---------|
| Advancing contact angle /° | 99.7            | 85.3            | 65.7            | 56.7            | 53.7            | 49.3           | 54.0            | 33.3    |
| Standard deviation /°      | 2.5             | 1.7             | 2.1             | 0.6             | 2.1             | 3.2            | 8.4             | 6.0     |
